# Supplementary material for: NaYF4:Er3+/Yb3+–graphene composites: preparation, upconversion luminescence, and application in dye-sensitized solar cells
Source: Royal Society of Chemistry journal article supplement (doi:10.1039/c2jm34113a), 2012-01-01

## Supporting Information

### NaYF<sub>4</sub>:Er<sup>3+</sup>/Yb<sup>3+</sup>-Graphene Composites: Preparation, Upconversion Luminescence, and Application in Dye- Sensitized Solar Cells

5

Ying Li, Guofeng Wang\*, Kai Pan, Baojiang Jiang, Chungui Tian, Wei Zhou, and Honggang Fu\*

10 *Key Laboratory of Functional Inorganic Material Chemistry, Ministry of Education,  
School of Chemistry and Materials Science, Heilongjiang University, Harbin, 150080,  
P. R. China. E-mail: wanggf75@gmail.com*

15 **Figure S1.** EDS analysis results of (a) RGC-1, (b) RGC-2, (c) RGC-3, (d) RGC-4, and (e) RGC-5.

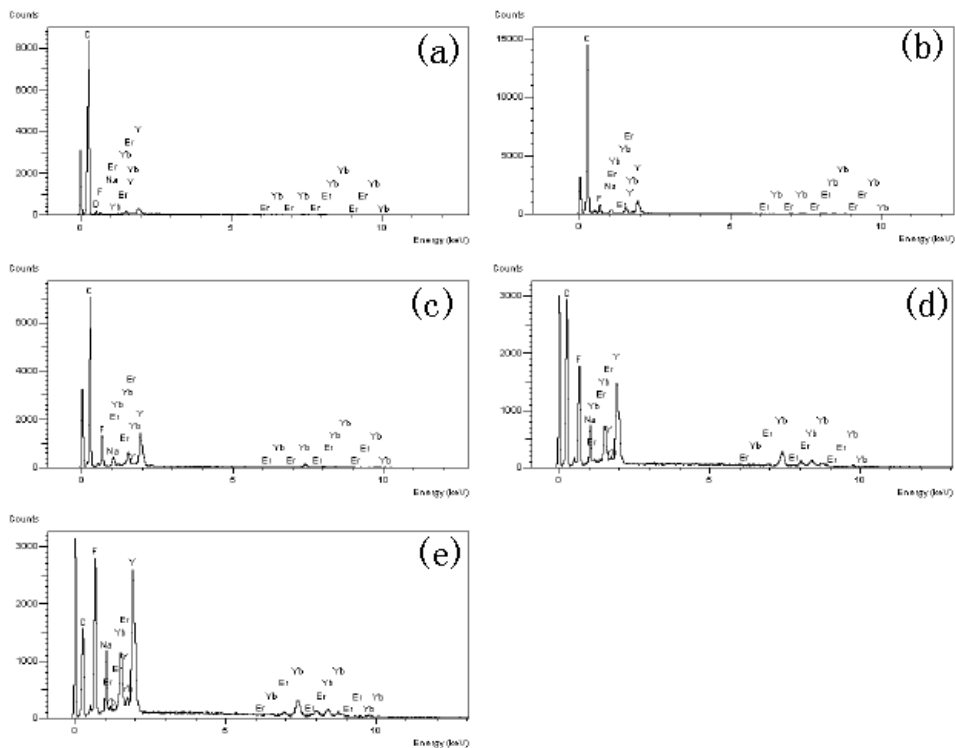

**Figure S2.** TGA curves of  $\text{NaYF}_4:\text{Er}^{3+}/\text{Yb}^{3+}$  and  $\text{NaYF}_4:\text{Er}^{3+}/\text{Yb}^{3+}$ -graphene composites.

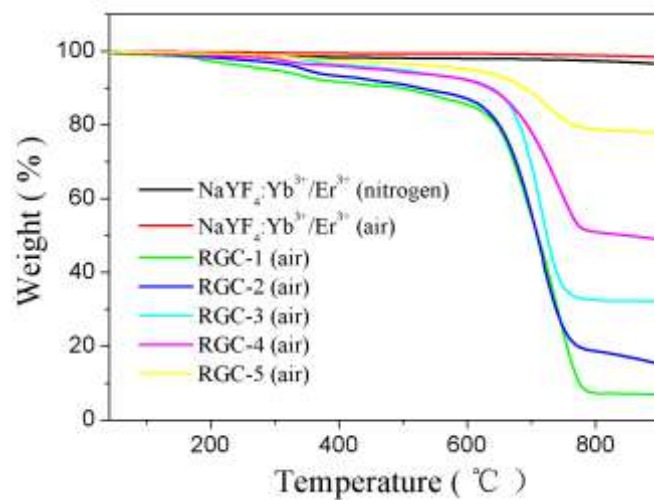

**Figure S3.** Energy-level and UC schemes for the  $\text{Yb}^{3+}$ - $\text{Er}^{3+}$  system.

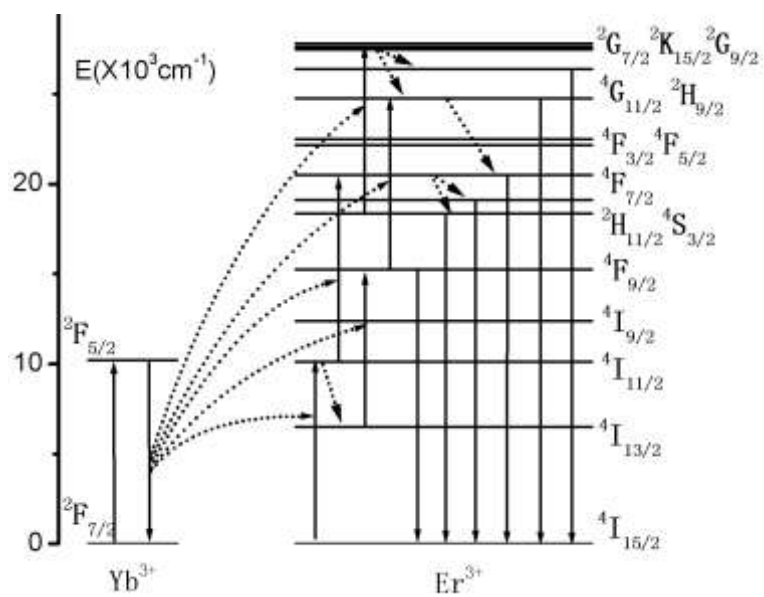

**Figure S4.** Equivalent circuit used to represent interfaces in composite solar cells composed of FTO|TiO<sub>2</sub>-dye|I<sub>3</sub><sup>-</sup>/I<sup>-</sup>||Pt|FTO

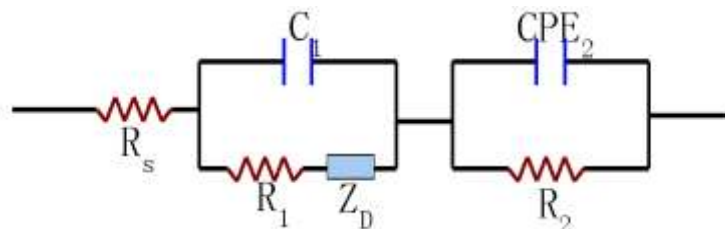

**Figure S5.** Comparison of diffusion lengths of TiO<sub>2</sub> and TiO<sub>2</sub>-RGC-5 photoanodes.

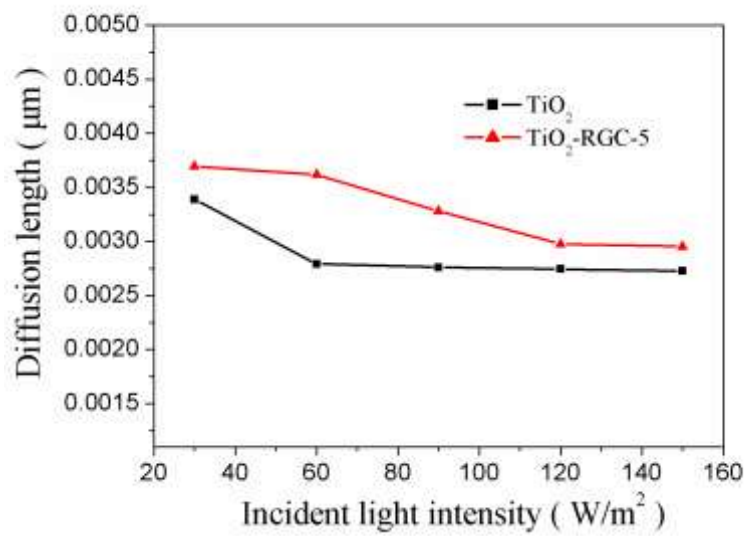

**Figure S6.** Comparison of diffusion coefficients of TiO<sub>2</sub> and TiO<sub>2</sub>-RGC-5 photoanodes.

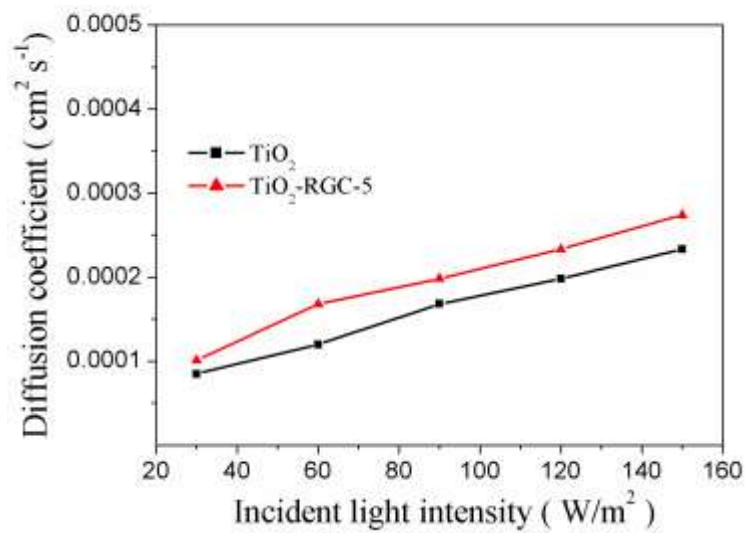

**Figure S7.** Comparison of transport time constant for DSSCs as a function of applied voltage (or quasi-Fermi energy).

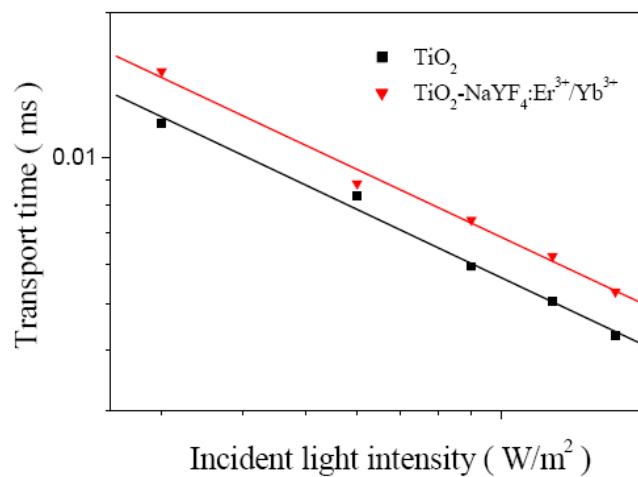

**Figure S8.** Nyquist plots of DSSCs comprised of pure  $\text{TiO}_2$  cell and  $\text{TiO}_2\text{-NaYF}_4\text{:Yb}^{3+}/\text{Er}^{3+}$  cell.

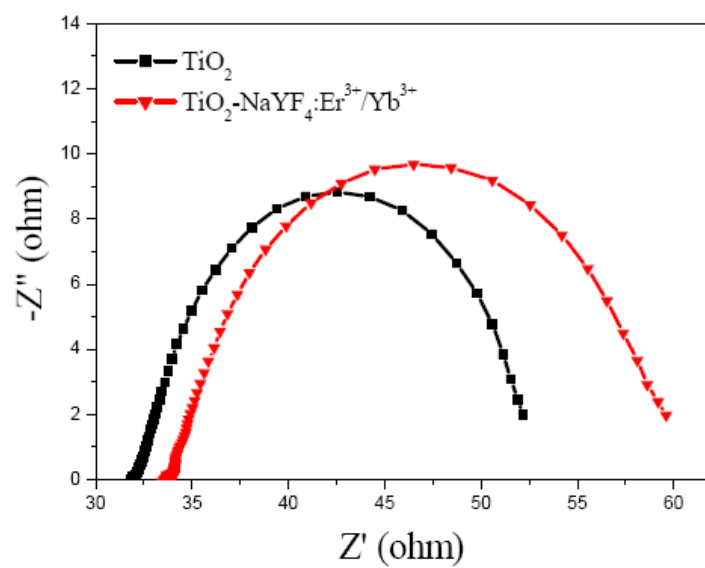

Supplement: c2jm34113a.pdf [file c2jm34113a.pdf]
